# Supplementary material for: A unique Bi–Bi bond forming reaction using organobismuth oxides and phosphorus compounds bearing a P(O)H group
Source: Royal Society of Chemistry journal article supplement (doi:10.1039/b914316e), 2009-01-01
Supplement: b914316e.pdf [file b914316e.pdf]

## Electronic Supplementary Information

# A Unique Bi-Bi Bond Forming Reaction Using Organobismuth Oxides and Phosphorus Compounds Bearing a P(=O)H group

Shigeru Shimada,<sup>\*a</sup> Junpei Maruyama,<sup>a,b</sup> Yoong-Kee Choe<sup>c</sup> and Takashi Yamashita<sup>b</sup>

<sup>a</sup> National Institute of Advanced Industrial Science and Technology (AIST), Tsukuba Central 5, 1-1-1 Higashi, Tsukuba, Ibaraki 305-8565 (Japan). Fax: (+81) 29-861-4511; Tel: (+81) 29-861-4511; E-mail: s-shimada@aist.go.jp

<sup>b</sup> Department of Pure and Applied Chemistry, Tokyo University of Science, 2641 Yamazaki, Noda, Chiba, 278-8510, Japan.

<sup>c</sup> Research Institute for Computational Sciences, National Institute of Advanced Industrial Science and Technology (AIST), Tsukuba Central 2, 1-1-1 Umezono, Tsukuba, Ibaraki 305-8578, Japan.

**General.** All manipulations of air-sensitive materials were carried out under a nitrogen atmosphere using standard Schlenk tube techniques or in a glovebox filled with nitrogen. Anhydrous toluene, 1,4-dioxane, hexane and dichloromethane were purchased from Kanto Chemicals and degassed before use.  $\text{CDCl}_3$  and  $[\text{D}_8]\text{toluene}$  were distilled from  $\text{CaH}_2$  and  $\text{Na/benzophenone ketyl}$ , respectively.  $^1\text{H}$ ,  $^{13}\text{C}$  and  $^{31}\text{P}$  spectra were recorded on Jeol LA500 or JNM-ECX400P spectrometers. Chemical Shifts are given in ppm using an external reference (tetramethylsilane (0 ppm) for  $^1\text{H}$  and  $^{13}\text{C}$ , and 85%  $\text{H}_3\text{PO}_4$  (0 ppm) for  $^{31}\text{P}$ ), and coupling constants were reported in hertz. Organobismuth oxide **2a**<sup>S1</sup> and 12-chloro-6-methyl-5,6,7,12-tetrahydrodibenz[*c,f*][1,5]azabismocine **8c**<sup>S2</sup> were prepared using the literature procedure.

### 1. Preparation of **2b** and **2c**.

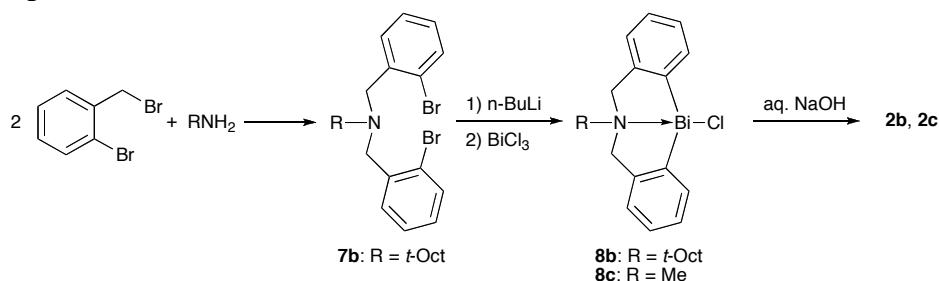

**Bis(2-bromophenylmethyl)(1,1,3,3-tetramethylbutyl)amine, 7b.** To a DMF (60 mL) suspension of 2-bromobenzyl bromide (50.0 g, 200 mmol) and NaI (164 mg, 1.09 mmol) were added dicyclohexylmethylamine (42.5 mL, 200 mmol) and

1,1,3,3-tetramethylbutylamine (15.1 mL, 91 mmol). The mixture was gradually heated to 120 °C and stirred for 16 hours at the same temperature. After cooling to room temperature, the mixture was filtered to remove solid, and the water (50 mL) and ether (100 mL) were added to the filtrate. The organic layer was separated, washed with water (3 x 50 mL), and dried over Na<sub>2</sub>SO<sub>4</sub>. After filtration, volatiles were removed under vacuum to leave crude product, which was treated with a mixture of ethanol (40 mL) and hexane (20 mL) to remove impurities, filtered, washed with ethanol, and dried under vacuum to give 36.0 g of the title compound as a colorless crystalline solid. Concentration of the filtrate to the half of the original volume further afforded 1.1 g of the title compound. Total 37.1 g, 87% yield. <sup>1</sup>H NMR (CDCl<sub>3</sub>, 399.8 MHz): δ 1.05 (9H, s), 1.29 (6H, s), 1.69 (2H, s), 3.87 (4H, s), 6.87 (2H, td, *J* = 7.8, 1.4 Hz), 7.07 (2H, t, *J* = 7.8 Hz), 7.30 (2H, dd, *J* = 7.8, 0.9 Hz), 7.53 (2H, dd, *J* = 7.8, 1.4 Hz). <sup>13</sup>C NMR (CDCl<sub>3</sub>, 100.53MHz) δ 27.74, 31.25, 32.03, 49.08, 53.85, 60.18, 123.48, 126.59, 127.55, 131.16, 132.04, 140.50. Anal. Calcd for C<sub>22</sub>H<sub>29</sub>Br<sub>2</sub>N: C, 56.55; H, 6.26; N, 3.00%. Found: C, 56.69; H, 6.07; N, 2.94%.

**12-chloro-6-(1,1,3,3-tetramethylbutyl)-5,6,7,12-tetrahydrodibenz[c,f][1,5]azabismocine, 8b.** To an ether (70 mL) solution of bis(2-bromophenylmethyl)(1,1,3,3-tetramethylbutyl)amine (11.7 g, 25.0 mmol) was added a hexane solution of *n*-BuLi (1.59 M, 31.5 mL, 50.1 mmol) at -30 °C. The mixture was slowly warmed to room temperature with stirring during the period of 3 hours, and then added drop by drop to an ethereal (200 mL) suspension of BiCl<sub>3</sub> (7.89 g, 25.0 mmol) cooled at -78 °C. The mixture was slowly warmed to room temperature during the period of 13 hours, and then stirred at the same temperature for 7 hours. The volatiles were removed under vacuum, and the residue was dissolved in a mixture of CHCl<sub>3</sub> (200mL) and 1N aqueous NH<sub>4</sub>Cl solution (100 mL). After filtration through Celite, the organic layer was separated, washed with water, dried over Na<sub>2</sub>SO<sub>4</sub>, filtered, and evacuated to remove volatiles to leave a crude product, which was treated with a 1:1 mixture of hexane and CH<sub>2</sub>Cl<sub>2</sub> (150 mL). White solid deposited was filtered and dried under vacuum to give **8b** (10.1 g). The filtrate was concentrated to ca. 10 mL, to which was added hexane (70 mL) to give additional **8b** (1.8 g). Total 11.9 g (86% yield). M.p. 254-256 °C. <sup>1</sup>H NMR (CDCl<sub>3</sub>, 399.8 MHz): δ 1.04 (9H, s), 1.37 (6H, s), 1.77 (2H, s), 4.11 (2H, d, *J* = 15.6 Hz), 4.54 (2H, d, *J* = 15.6 Hz), 7.32 (2H, td, *J* = 7.3, 1.1 Hz), 7.41 (2H, d, *J* = 7.3 Hz), 7.48 (2H, t, *J* = 7.6 Hz), 8.65 (2H, d, *J* = 7.3 Hz). <sup>13</sup>C NMR (CDCl<sub>3</sub>, 100.53MHz, 50 °C) δ 27.40, 31.73, 31.77, 50.68, 59.82, 64.33, 127.36, 128.12, 130.70, 138.30, 151.29, 170.78. Anal. Calcd for C<sub>22</sub>H<sub>29</sub>BiClN: C, 47.88; H, 5.30; N, 2.54%. Found: C, 47.64; H, 5.09; N, 2.40%.

**Bismuth oxide, 2b.** A mixture of **8b** (5.0 g, 9.1 mmol) in CH<sub>2</sub>Cl<sub>2</sub> (100 mL) and aqueous NaOH solution (1.0 M, 91 mL, 91 mmol) was vigorously stirred at room temperature for 3 hours under N<sub>2</sub>. The organic layer was separated, washed with water, dried over Na<sub>2</sub>SO<sub>4</sub>, filtered, and evacuated to remove volatiles to give **2b** as a colorless solid (4.6 g, 96%). M.p. 124-126 °C. <sup>1</sup>H NMR (C<sub>6</sub>D<sub>6</sub>, 499.1 MHz): δ

0.87 (18H, s), 1.11 (12H, s), 1.54 (4H, s), 3.68 (4H, d,  $J = 15.8$  Hz), 4.02 (4H, d,  $J = 15.8$  Hz), 7.09 - 7.14 (8H, m), 7.37 (4H, t,  $J = 7.3$  Hz), 9.05 (4H, d,  $J = 7.3$  Hz). Anal. Calcd for  $C_{44}H_{58}Bi_2N_2O$ : C, 50.38; H, 5.57; N, 2.67%. Found: C, 50.48; H, 5.48; N, 2.56%.

**Bismuth oxide 2c.** A mixture of **8c** (585 mg, 1.29 mmol) in  $CH_2Cl_2$  (5 mL) and aqueous NaOH solution (0.5 M, 5 mL, 2.5 mmol) was vigorously stirred at room temperature for 1 hours under  $N_2$ . Organic layer was separated, washed with water, dried over  $Na_2SO_4$ , filtered, and evacuated to remove volatiles to give **2c** as a colorless solid (486 mg, 88%).  $^1H$  NMR ( $C_6D_6$ , 499.1 MHz):  $\delta$  2.02 (6H, s), 3.28 (4H, d,  $J = 14.6$  Hz), 3.60 (4H, d,  $J = 14.6$  Hz), 7.07 (4H, d,  $J = 7.3$  Hz), 7.13 (4H, t,  $J = 7.3$  Hz), 7.39 (4H, t,  $J = 7.3$  Hz), 8.99 (4H, d,  $J = 7.3$  Hz).

**Dibismuthane 1b.** A 1,4-dioxane (40 mL) solution of **2b** (3.00 g, 2.86 mmol) and **5** (412 mg, 1.91 mmol) was stirred at 90 °C for 1 hour. The precipitated red-orange solid was separated by filtration, washed with 1,4-dioxane, and dried under vacuum to give **1b** (1.33 g). The filtrate was concentrated and mixed with 1,4-dioxane (15 mL) to leave a red-orange solid, which was separated by filtration, washed with 1,4-dioxane, and dried under vacuum to give additional **1b** (0.22 g). Total 1.55 g (79% based on **5**). M.p. 181-182 °C.  $^1H$ -NMR ( $C_6D_6$ , 499.1 MHz):  $\delta$  0.93 (18H, s), 1.27 (12H, s), 1.66 (4H, s) 3.83 (4H, d,  $J = 15.8$  Hz), 4.05 (4H, d,  $J = 15.8$  Hz), 6.85 (4H, t,  $J = 7.3$  Hz), 7.06-7.12 (8H, m), 8.89 (4H, d,  $J = 7.3$  Hz). Anal. Calcd for  $C_{44}H_{58}Bi_2N_2$ : C, 51.23; H, 5.73; N, 2.66%. Found: C, 51.52; H, 5.60; N, 2.57%.

**Dibismuthane 1c.** A 1,4-dioxane (10 mL) solution of **2c** (400 mg, 0.46 mmol) and **5** (68 mg, 0.31 mmol) was stirred at 90 °C for 1 hour. The precipitated solid consisting of red-orange **2c** and uncharacterized gray fine powder was separated by filtration, washed with 1,4-dioxane, and dried under vacuum to a crude mixture (338 mg).  $^1H$  NMR analysis of the mixture showed that the soluble part was almost pure **2b**. The crude product was mixed with THF (100 mL) and filtered, and the filtrate was evacuated to give **2b** (59 mg, 23%).  $^1H$  NMR ( $C_6D_6$ , 499.1 MHz):  $\delta$  2.19 (6H, s), 3.32 (4H, d,  $J = 14.2$  Hz), 3.73 (4H, d,  $J = 14.2$  Hz), 6.84 (4H, td,  $J = 7.3, 1.8$  Hz), 7.01-7.09 (8H, m), 8.63 (4H, d,  $J = 7.3$  Hz). Anal. Calcd for  $C_{30}H_{30}Bi_2N_2$ : C, 43.07; H, 3.61; N 3.35%. Found: C, 43.51; H, 3.42; N, 3.21%.

## 2. Reaction of dibismuthane 2b with disulfide 9.

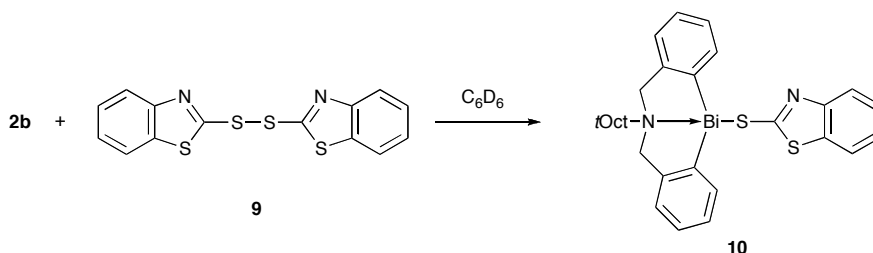

**2b** (10 mg, 9.7 mmol) and **9** (3.2 mg, 9.6 mmol) in C<sub>6</sub>D<sub>6</sub> (0.6 mL) in NMR tube was shaken under nitrogen at room temperature. After 10 min, all the solid dissolved, and the color of the mixture became pale yellow. <sup>1</sup>H NMR spectrum of the mixture showed almost complete consumption of **2b** and **9**, and nearly quantitative formation of **10**. <sup>1</sup>H NMR (C<sub>6</sub>D<sub>6</sub>, 499.1 MHz):  $\delta$  0.79 (9H, s), 0.90 (6H, s), 1.35 (2H, s), 3.59 (2H, d,  $J = 15.5$  Hz), 3.83 (2H, d,  $J = 15.5$  Hz), 6.89 (1H, t,  $J = 7.3$  Hz), 7.00-7.04 (3H, m), 7.12 (2H, td,  $J = 7.3, 1.4$  Hz), 7.20 (2H, t,  $J = 7.3$  Hz), 7.31 (1H, d,  $J = 7.8$  Hz), 7.81 (1H, d,  $J = 7.8$  Hz), 9.07 (2H, dd,  $J = 7.3, 1.4$  Hz).

**X-ray Crystallography.** Data collection was performed on a Bruker Smart Apex CCD diffractometer (Mo K $\alpha$  radiation, graphite monochromator). Data were corrected for absorption.<sup>S3</sup> The structures were solved by the Patterson method<sup>S4</sup> and expanded using Fourier techniques.<sup>S5</sup> Structure refinement was carried out by full-matrix least squares on  $F^2$ . The hydrogen atoms were placed in calculated positions and refined using a riding model. For compound **1c**, the hydrogen atoms bound to the toluene molecule could not be located because of disorder. Structure solution and refinement were performed using CrystalStructure software package<sup>S6</sup> with Crystals<sup>S7</sup> program. Molecular structure drawings were generated using CrystalMaker program.<sup>S8</sup>

#### References:

- S1 S. F. Yin, J. Maruyama, T. Yamashita and S. Shimada, *Angew. Chem., Int. Ed.*, 2008, **47**, 6590-6593.
- S2 K. Ohkata, S. Takemoto, M. Ohnishi and K. Akiba, *Tetrahedron Lett.* 1989, **30**, 4841-4844
- S3 SADABS; G. M. Sheldrick, 1996.
- S4 PATTY; P. T. Beurskens, G. Admiraal, G. Beurskens, W. P. Bosman, S. Garcia-Granda, R. O. Gould, J. M. M. Smits and C. Smykalla, 1992, The DIRDIF program system, Technical Report of the Crystallography Laboratory, University of Nijmegen, The Netherlands..
- S5 DIRDIF99; P. T. Beurskens, G. Admiraal, G. Beurskens, W. P. Bosman, R. de Gelder, R. Israel and J. M. M. Smits, 1999, The DIRDIF-99 program system, Technical Report of the Crystallography Laboratory, University of Nijmegen, The Netherlands.
- S6 CrystalStructure version 3.8; Rigaku and Rigaku/MSC, 2006.
- S7 Crystals issue 11; J. R. Carruthers, J. S. Rollett, P. W. Betteridge, D. Kinna, L. Pearce, A. Larsen, and E. Gabe, Chemical Crystallography Laboratory, Oxford, UK, 1999.
- S8 CrystalMaker for Mac OSX, version 8.2.0; CrystalMaker Software Limited, 2009.
